# Supplementary material for: Mutations in the Gene Encoding the Ancillary Pilin Subunit of the Streptococcus suis srtF Cluster Result in Pili Formed by the Major Subunit Only
Source: PubMed Central journal article supplement (PMC2797073; doi:10.1371/journal.pone.0008426), 2010-01-05

1 2 3 4 5 6 7 8 9 10

9.34 kb →

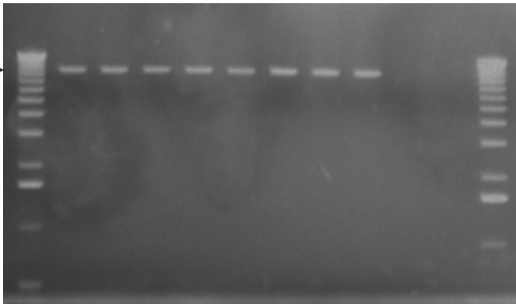

Supplement: pone.0008426.s001.pdf [file pone.0008426.s001.pdf]
